# Supplementary material for: Ancestral Sperm Ecotypes Reveal Multiple Invasions of a Non-Native Fish in Northern Europe
Source: MDPI journal article supplement (doi:10.3390/cells10071743), 2021-07-09
Supplement: s1 [file s1]

Supplementary information for:

## Ancestral Sperm Ecotypes Reveal Multiple Invasions of a Non-native Fish in Northern Europe

Leon Green<sup>1,2,3,\*</sup>, Apostolos Apostolou<sup>4</sup>, Ellika Faust<sup>2,5</sup>, Kajsa Palmqvist<sup>1</sup>, Jane W. Behrens<sup>6</sup>, Jonathan N. Havenhand<sup>2,5</sup>, Erica H. Leder<sup>2,5,7</sup> and Charlotta Kvarnemo<sup>1,2</sup>

<sup>1</sup> Department of Biological and Environmental Sciences, University of Gothenburg, Medicinaregatan 18A, 41390 Gothenburg, Sweden; kajsa.palmqvist@gmail.com (K.P.); lotta.kvarnemo@bioenv.gu.se (C.K.)

<sup>2</sup> Linnaeus Centre for Marine Evolutionary Biology, University of Gothenburg, Tjärnö Marine Laboratory, Laboratorievägen 10, 45296 Strömstad, Sweden; ellika.faust@marine.gu.se (E.F.); jon.havenhand@marine.gu.se (J.N.H.); erica.leder@marine.gu.se (E.L.)

<sup>3</sup> Gothenburg Global Biodiversity Centre, University of Gothenburg, Karl Skottbergs gata 22, 41390 Gothenburg, Sweden

<sup>4</sup> Institute for Biodiversity and Ecosystem Research, Bulgarian Academy of Sciences, Tsar Osvoboditel Blvd. 1, 1000 Sofia, Bulgaria; apostolosfish@abv.bg

<sup>5</sup> Department of Marine Sciences, University of Gothenburg, Tjärnö Marine Laboratory, Laboratorievägen 10, 45296 Strömstad, Sweden

<sup>6</sup> National Institute of Aquatic Resources, Technical University of Denmark, Kemitorvet, Building 202, 2800 Kgs. Lyngby, Denmark; jabe@aqu.dtu.dk

<sup>7</sup> Natural History Museum, University of Oslo, Sars' gate 1, 0562 Oslo, Norway

\* Correspondence: leon.green@bioenv.gu.se

**Supplementary table 1.** Sites, their meta data, sources and summary of phenotypes and genotypes of round gobies (*Neogobius melanostomus*) used for this study.

| Site            | Region                        | Coordinates<br>(Lat, Long<br>in EPSG:4326) | Local<br>salinity<br>(PSU) | Salinities where<br>sperm were tested<br>(PSU) |
|-----------------|-------------------------------|--------------------------------------------|----------------------------|------------------------------------------------|
| Sozopol         | ancestral Black<br>Sea        | 42,4333, 27,7011                           | 14-18                      | 0; 8; 16; 24; 32                               |
| Kindvig         | Southern Baltic               | 55,2788, 12,4463                           | ~15                        | 1; 5; 10; 15; 20; 25; 30                       |
| Karrebaeksmünde | Southern Baltic               | 55,1747, 11,6409                           | ~15                        | 1; 5; 10; 15; 20; 25; 30                       |
| Guldborgsund    | Southern Baltic               | 54,8558, 11,7497                           | 8-22                       | 0; 16; 32                                      |
| Travemünde      | Southern Baltic               | 53,8956, 10,7979                           | 10-15                      | 0; 16                                          |
| Mariehamn       | Northern Baltic               | 60,1012, 19,9227                           | ~5                         | 1; 5; 10; 15; 20; 25; 30                       |
| Turku           | Northern Baltic               | 60,4209, 22,0915                           | ~5                         | 1; 5; 10; 15; 20; 25; 30                       |
| Raahe           | Northern Baltic               | 64,6586, 24,4158                           | ~2                         | 1; 5; 10; 15; 20; 25; 30                       |
| Elbe            | western<br>European<br>rivers | 53,5491, 9,9861                            | 0                          | 0; 16; 32                                      |
| Rhine           | western<br>European<br>rivers | 51,8609, 6,0715                            | 0                          | 0; 16; 32                                      |
| Danube          | ancestral river               | 44,0538, 26,6171                           | 0                          | 0; 8; 16; 24; 32                               |

**Supplementary table 1 cont.**

| Site            | Genotypes sequenced | Genotypes kept after filtering | Filtered genotypes sampled together with sperm | Library  | Sequencing year | Data from                    |
|-----------------|---------------------|--------------------------------|------------------------------------------------|----------|-----------------|------------------------------|
| Sozopol         | N = 30              | N = 29                         | N = 10                                         | 3, 4 & 5 | 2019            | This study                   |
| Kindvig         | N = 31              | N = 5                          | N/A                                            | 3, 4 & 5 | 2019            | Green, Havenhand et al. 2020 |
| Karrebaeksminde | N = 20              | N = 13                         | N = 5                                          | 3, 4 & 5 | 2019            | Green, Havenhand et al. 2020 |
| Guldborgsund    | N = 32              | N = 32                         | N = 19                                         | 1 & 2    | 2017            | Green, Niemax et al. 2021    |
| Travemünde      | N = 31              | N = 31                         | N/A                                            | 1 & 2    | 2017            | Green, Niemax et al. 2020    |
| Mariehamn       | N = 30              | N = 26                         | N = 8                                          | 3, 4 & 5 | 2019            | Green, Havenhand et al. 2020 |
| Turku           | N = 30              | N = 27                         | N = 4                                          | 3, 4 & 5 | 2019            | Green, Havenhand et al. 2020 |
| Raahe           | N = 22              | N = 22                         | N = 7                                          | 3, 4 & 5 | 2019            | Green, Havenhand et al. 2020 |
| Elbe            | N = 30              | N = 29                         | N = 5                                          | 1 & 2    | 2017            | Green, Niemax et al. 2021    |
| Rhine           | N = 32              | N = 32                         | N = 8                                          | 1 & 2    | 2017            | Green, Niemax et al. 2021    |
| Danube          | N = 31              | N = 18                         | N = 12                                         | 3, 4 & 5 | 2019            | This study                   |

**Supplementary Table 2.** Results from linear models of sperm performance in *Neogobius melanostomus* across 8 introduced sites from previously published data together with two ancestral (freshwater marked with asterix, brackish marked with cross) sites from this study. Models were performed independently for sperm velocity and sperm motility and compared performance in four different conditions: freshwater (a) (0-1 practical salinity units (PSU)); (b) brackish (15-16 PSU); (c) marine (30-32 PSU); (d) local (varying PSU, see table for details). Note also that estimates for Marine and Local models are offset to show the estimate of the first site in the list. \* =  $p < 0.05$ , \*\* =  $p < 0.01$ , \*\*\* =  $p < 0.001$ .

| a) Sperm velocity tested in freshwater (0-1 PSU) |        |           |        |          |          |        |                |                     |
|--------------------------------------------------|--------|-----------|--------|----------|----------|--------|----------------|---------------------|
| Model:                                           | Num.df | Denom. df | S.S.   | M.S.     | F        | p      | R <sup>2</sup> | Adj. R <sup>2</sup> |
| lm(Velocity ~ Site, data = sperm in 0-1 PSU)     | 10     | 86        | 4172.0 | 417.20   | 4.05     | <0.001 | 0.320          | 0.241               |
| Site (group)                                     | N      | Estimate  | S.E.   | lower CI | upper CI | t      | p              | Sing.               |
| Danube* (Intercept)                              | 14     | 62.89     | 2.713  | 57.50    | 68.29    | 23.18  | <0.001         | ***                 |
| Rhine                                            | 5      | -6.94     | 5.288  | -17.46   | 3.57     | -1.31  | 0.193          |                     |
| Elbe                                             | 4      | -12.68    | 5.755  | -24.12   | -1.24    | -2.20  | 0.030          | *                   |
| Raahe                                            | 7      | -3.02     | 4.699  | -12.36   | 6.33     | -0.64  | 0.523          |                     |
| Turku                                            | 5      | -7.71     | 5.288  | -18.23   | 2.80     | -1.46  | 0.148          |                     |
| Mariehamn                                        | 10     | -10.17    | 4.203  | -18.52   | -1.81    | -2.42  | 0.018          | *                   |
| Travemünde                                       | 20     | -9.71     | 3.537  | -16.74   | -2.68    | -2.75  | 0.007          | **                  |
| Guldborgsund                                     | 9      | -18.34    | 4.337  | -26.96   | -9.72    | -4.23  | <0.001         | ***                 |
| Karrebaeksmünde                                  | 6      | -13.80    | 4.953  | -23.65   | -3.95    | -2.79  | 0.007          | **                  |
| Kindvig                                          | 6      | -18.22    | 4.953  | -28.07   | -8.37    | -3.68  | <0.001         | ***                 |
| Sozopol†                                         | 11     | -20.62    | 4.090  | -28.75   | -12.49   | -5.04  | <0.001         | ***                 |
| b) Sperm motility tested in freshwater (0-1 PSU) |        |           |        |          |          |        |                |                     |
| Model:                                           | Num.df | Denom. df | S.S.   | M.S.     | F        | p      | R <sup>2</sup> | Adj. R <sup>2</sup> |
| lm(Motility ~ Site, data = sperm in 0-1 PSU)     | 10     | 86        | 0.482  | 0.048    | 5.31     | <0.001 | 0.382          | 0.310               |
| Site (group)                                     | N      | Estimate  | S.E.   | lower CI | upper CI | t      | p              | Sing.               |
| Danube* (Intercept)                              | 14     | 0.09      | 0.026  | 0.04     | 0.15     | 3.73   | <0.001         | ***                 |
| Rhine                                            | 5      | -0.01     | 0.049  | -0.11    | 0.09     | -0.24  | 0.809          |                     |
| Elbe                                             | 4      | -0.07     | 0.054  | -0.17    | 0.04     | -1.21  | 0.229          |                     |
| Raahe                                            | 7      | -0.08     | 0.044  | -0.16    | 0.01     | -1.70  | 0.092          |                     |
| Turku                                            | 5      | 0.21      | 0.050  | 0.11     | 0.31     | 4.23   | <0.001         | ***                 |
| Mariehamn                                        | 10     | -0.01     | 0.040  | -0.09    | 0.07     | -0.20  | 0.844          |                     |
| Travemünde                                       | 20     | -0.04     | 0.033  | -0.10    | 0.03     | -1.11  | 0.269          |                     |
| Guldborgsund                                     | 9      | -0.09     | 0.041  | -0.17    | -0.01    | -2.19  | 0.032          | *                   |
| Karrebaeksmünde                                  | 6      | 0.10      | 0.047  | 0.01     | 0.19     | 2.15   | 0.034          | *                   |
| Kindvig                                          | 6      | 0.01      | 0.047  | -0.08    | 0.10     | 0.22   | 0.823          |                     |

|                                                                      |               |                  |             |                 |                 |          |                      |                           |
|----------------------------------------------------------------------|---------------|------------------|-------------|-----------------|-----------------|----------|----------------------|---------------------------|
| Sozopol†                                                             | 11            | -0.08            | 0.038       | -0.16           | -0.00           | -2.10    | 0.038                | *                         |
| <b>c) Sperm velocity tested in brackish conditions (15-16 PSU)</b>   |               |                  |             |                 |                 |          |                      |                           |
| <b>Model:</b>                                                        | <b>Num.df</b> | <b>Denom. df</b> | <b>S.S.</b> | <b>M.S.</b>     | <b>F</b>        | <b>p</b> | <b>R<sup>2</sup></b> | <b>Adj. R<sup>2</sup></b> |
| lm(Velocity ~ Site, data = sperm in 15-16 PSU)                       | 10            | 87               | 64610       | 6461            | 15.46           | <0.001   | 0.640                | 0.598                     |
| <b>Site (group)</b>                                                  | <b>N</b>      | <b>Estimate</b>  | <b>S.E.</b> | <b>lower CI</b> | <b>upper CI</b> | <b>t</b> | <b>p</b>             | <b>Sing.</b>              |
| Sozopol† (Intercept)                                                 | 12            | 102.87           | 5.902       | 91.14           | 114.60          | 17.43    | <0.001               | ***                       |
| Kindvig                                                              | 6             | 7.30             | 10.222      | -13.02          | 27.61           | 0.71     | 0.477                |                           |
| Karrebaeksminde                                                      | 6             | 3.98             | 10.222      | -16.34          | 24.30           | 0.39     | 0.698                |                           |
| Guldborgsund                                                         | 9             | 4.68             | 9.015       | -13.23          | 22.60           | 0.52     | 0.605                |                           |
| Travemünde                                                           | 20            | 18.42            | 7.465       | 3.58            | 33.25           | 2.47     | 0.016                | *                         |
| Mariehamn                                                            | 10            | -15.03           | 8.754       | -32.43          | 2.37            | -1.72    | 0.089                |                           |
| Turku                                                                | 5             | 12.51            | 10.882      | -9.12           | 34.14           | 1.15     | 0.254                |                           |
| Raahe                                                                | 7             | -6.13            | 9.723       | -25.45          | 13.20           | -0.63    | 0.530                |                           |
| Elbe                                                                 | 4             | -30.81           | 11.804      | -54.27          | -7.35           | -2.61    | 0.011                | *                         |
| Rhine                                                                | 5             | -25.00           | 10.882      | -46.63          | -3.37           | -2.30    | 0.024                | *                         |
| Danube*                                                              | 14            | -61.47           | 8.043       | -77.46          | -45.49          | -7.64    | <0.001               | ***                       |
| <b>d) Sperm motility tested in brackish conditions (15-16 PSU)</b>   |               |                  |             |                 |                 |          |                      |                           |
| <b>Model:</b>                                                        | <b>Num.df</b> | <b>Denom. df</b> | <b>S.S.</b> | <b>M.S.</b>     | <b>F</b>        | <b>p</b> | <b>R<sup>2</sup></b> | <b>Adj. R<sup>2</sup></b> |
| lm(Motility ~ Site, data = sperm in 15-16 PSU)                       | 10            | 87               | 1.598       | 0.160           | 22.25           | <0.001   | 0.719                | 0.687                     |
| <b>Site (group)</b>                                                  | <b>N</b>      | <b>Estimate</b>  | <b>S.E.</b> | <b>lower CI</b> | <b>upper CI</b> | <b>t</b> | <b>p</b>             | <b>Sing.</b>              |
| Sozopol† (Intercept)                                                 | 12            | 0.13             | 0.025       | 0.08            | 0.17            | 5.12     | <0.001               | ***                       |
| Kindvig                                                              | 6             | 0.41             | 0.042       | 0.33            | 0.50            | 9.78     | <0.001               | ***                       |
| Karrebaeksminde                                                      | 6             | 0.21             | 0.042       | 0.12            | 0.29            | 4.92     | <0.001               | ***                       |
| Guldborgsund                                                         | 9             | 0.02             | 0.037       | -0.06           | 0.09            | 0.49     | 0.623                |                           |
| Travemünde                                                           | 20            | 0.06             | 0.031       | -0.00           | 0.12            | 1.92     | 0.058                |                           |
| Mariehamn                                                            | 10            | 0.05             | 0.036       | -0.02           | 0.13            | 1.48     | 0.143                |                           |
| Turku                                                                | 5             | 0.04             | 0.045       | -0.05           | 0.13            | 0.95     | 0.345                |                           |
| Raahe                                                                | 7             | -0.05            | 0.040       | -0.13           | 0.03            | -1.22    | 0.237                |                           |
| Elbe                                                                 | 4             | -0.08            | 0.049       | -0.18           | 0.02            | -1.63    | 0.106                |                           |
| Rhine                                                                | 5             | -0.10            | 0.045       | -0.19           | -0.01           | -2.12    | 0.037                | *                         |
| Danube*                                                              | 14            | -0.12            | 0.033       | -0.19           | -0.05           | -3.59    | 0.001                | ***                       |
| <b>e) Sperm velocity tested in marine conditions (30-32 PSU)</b>     |               |                  |             |                 |                 |          |                      |                           |
| <b>Model:</b>                                                        | <b>Num.df</b> | <b>Denom. df</b> | <b>S.S.</b> | <b>M.S.</b>     | <b>F</b>        | <b>p</b> | <b>R<sup>2</sup></b> | <b>Adj. R<sup>2</sup></b> |
| lm(Velocity ~ Site, offset = global mean, data = sperm in 30-32 PSU) | 9             | 65               | 11224       | 1247.06         | 5.27            | <0.001   | 0.422                | 0.342                     |
| <b>Site (group)</b>                                                  | <b>N</b>      | <b>Estimate</b>  | <b>S.E.</b> | <b>lower CI</b> | <b>upper CI</b> | <b>t</b> | <b>p</b>             | <b>Sing.</b>              |
| Sozopol† (Intercept)                                                 | 11            | 6.89             | 4.638       | -2.37           | 16.16           | 1.49     | 0.142                |                           |
| Kindvig                                                              | 6             | 8.45             | 7.807       | -7.15           | 24.04           | 1.08     | 0.283                |                           |
| Karrebaeksminde                                                      | 6             | -5.42            | 7.807       | -21.01          | 10.18           | -0.69    | 0.490                |                           |
| Guldborgsund                                                         | 9             | 11.44            | 6.914       | -2.37           | 25.24           | 1.65     | 0.103                |                           |

|                                                                           |               |                  |             |                 |                 |          |                      |                           |
|---------------------------------------------------------------------------|---------------|------------------|-------------|-----------------|-----------------|----------|----------------------|---------------------------|
| Mariehamn                                                                 | 9             | -10.81           | 6.914       | -24.62          | 3.00            | -1.56    | 0.123                |                           |
| Turku                                                                     | 5             | -5.00            | 8.297       | -21.57          | 11.57           | -0.60    | 0.549                |                           |
| Raahe                                                                     | 6             | -7.91            | 7.807       | -23.51          | 7.68            | -1.01    | 0.314                |                           |
| Elbe                                                                      | 4             | -7.22            | 8.981       | -25.16          | 10.71           | -0.80    | 0.422                |                           |
| Rhine                                                                     | 5             | -10.53           | 8.297       | -27.10          | 6.04            | -1.27    | 0.209                |                           |
| Danube*                                                                   | 14            | -27.64           | 6.198       | -40.01          | -15.26          | -4.46    | <0.001               | ***                       |
| <b>f) Sperm motility tested in marine conditions (30-32 PSU)</b>          |               |                  |             |                 |                 |          |                      |                           |
| <b>Model:</b>                                                             | <b>Num.df</b> | <b>Denom. df</b> | <b>S.S.</b> | <b>M.S.</b>     | <b>F</b>        | <b>p</b> | <b>R<sup>2</sup></b> | <b>Adj. R<sup>2</sup></b> |
| lm(Motility ~ Site, offset = global mean, data = sperm in 30-32 PSU)      | 9             | 65               | 0.070       | 0.008           | 2.01            | 0.052    | 0.218                | 0.110                     |
| <b>Site (group)</b>                                                       | <b>N</b>      | <b>Estimate</b>  | <b>S.E.</b> | <b>lower CI</b> | <b>upper CI</b> | <b>t</b> | <b>p</b>             | <b>Sing.</b>              |
| Sozopol† (Intercept)                                                      | 11            | -0.01            | 0.019       | -0.05           | 0.03            | -0.61    | 0.544                |                           |
| Kindvig                                                                   | 6             | 0.09             | 0.032       | 0.02            | 0.15            | 2.71     | 0.009                | **                        |
| Karrebaeksminde                                                           | 6             | 0.02             | 0.032       | -0.04           | 0.08            | 0.68     | 0.500                |                           |
| Guldborgsund                                                              | 9             | 0.04             | 0.028       | -0.01           | 0.10            | 1.55     | 0.125                |                           |
| Mariehamn                                                                 | 9             | 0.01             | 0.028       | -0.05           | 0.06            | 0.21     | 0.831                |                           |
| Turku                                                                     | 5             | 0.04             | 0.036       | -0.03           | 0.10            | 1.10     | 0.274                |                           |
| Raahe                                                                     | 6             | 0.00             | 0.032       | -0.06           | 0.07            | 0.09     | 0.929                |                           |
| Elbe                                                                      | 4             | -0.01            | 0.036       | -0.08           | 0.07            | -0.20    | 0.839                |                           |
| Rhine                                                                     | 5             | -0.01            | 0.034       | -0.08           | 0.05            | -0.43    | 0.665                |                           |
| Danube*                                                                   | 14            | -0.02            | 0.025       | -0.07           | 0.03            | -0.93    | 0.353                |                           |
| <b>g) Sperm velocity tested in local conditions (see Site for values)</b> |               |                  |             |                 |                 |          |                      |                           |
| <b>Model:</b>                                                             | <b>Num.df</b> | <b>Denom. df</b> | <b>S.S.</b> | <b>M.S.</b>     | <b>F</b>        | <b>p</b> | <b>R<sup>2</sup></b> | <b>Adj. R<sup>2</sup></b> |
| lm(Velocity ~ Site, offset = global mean, data = sperm in local PSU)      | 10            | 87               | 55528       | 5552.8          | 18.24           | <0.001   | 0.677                | 0.640                     |
| <b>Site (group)</b>                                                       | <b>N</b>      | <b>Estimate</b>  | <b>S.E.</b> | <b>lower CI</b> | <b>upper CI</b> | <b>t</b> | <b>p</b>             | <b>Sing.</b>              |
| Sozopol† (Intercept) (16 PSU)                                             | 12            | 8.63             | 5.037       | -1.38           | 18.64           | 1.71     | 0.090                |                           |
| Kindvig (15 PSU)                                                          | 6             | 7.30             | 8.724       | -10.04          | 24.64           | 0.84     | 0.405                |                           |
| Karrebaeksminde (15 PSU)                                                  | 6             | 3.98             | 8.724       | -13.36          | 21.32           | 0.46     | 0.649                |                           |
| Guldborgsund (16 PSU)                                                     | 9             | 4.68             | 7.694       | -10.61          | 19.98           | 0.61     | 0.544                |                           |
| Travemünde (16 PSU)                                                       | 20            | 18.42            | 6.371       | 5.75            | 31.08           | 2.89     | 0.005                | **                        |
| Mariehamn (5 PSU)                                                         | 10            | -23.22           | 7.470       | -38.07          | -8.37           | -3.11    | 0.003                | **                        |
| Turku (5 PSU)                                                             | 5             | 16.79            | 9.287       | -1.67           | 35.25           | 1.81     | 0.074                |                           |
| Raahe (5 PSU)                                                             | 7             | -24.39           | 8.298       | -40.88          | -7.89           | -2.94    | 0.004                | **                        |
| Elbe (0 PSU)                                                              | 4             | -52.65           | 10.073      | -72.67          | -32.63          | -5.23    | <0.001               | ***                       |
| Rhine (0 PSU)                                                             | 5             | -46.92           | 9.287       | -65.38          | -28.46          | -5.05    | <0.001               | ***                       |
| Danube* (0 PSU)                                                           | 14            | -39.97           | 6.864       | -53.62          | -26.33          | -5.82    | <0.001               | ***                       |
| <b>h) Sperm motility tested in local conditions (see Site for values)</b> |               |                  |             |                 |                 |          |                      |                           |
| <b>Model:</b>                                                             | <b>Num.df</b> | <b>Denom. df</b> | <b>S.S.</b> | <b>M.S.</b>     | <b>F</b>        | <b>p</b> | <b>R<sup>2</sup></b> | <b>Adj. R<sup>2</sup></b> |
| lm(Motility ~ Site, offset = global mean, data = sperm in local PSU)      | 10            | 87               | 1.747       | 0.175           | 16.956          | <0.001   | 0.661                | 0.622                     |

| Site (group)                  | N  | Estimate | S.E.  | lower CI | upper CI | <i>t</i> | <i>p</i> | Sing. |
|-------------------------------|----|----------|-------|----------|----------|----------|----------|-------|
| Sozopol† (Intercept) (16 PSU) | 12 | -0.08    | 0.029 | -0.14    | -0.02    | -2.78    | 0.007    | **    |
| Kindvig (15 PSU)              | 6  | 0.41     | 0.051 | 0.31     | 0.52     | 8.16     | <0.001   | ***   |
| Karrebaeksminde (15 PSU)      | 6  | 0.21     | 0.051 | 0.11     | 0.31     | 4.11     | <0.001   | ***   |
| Guldborgsund (16 PSU)         | 9  | 0.02     | 0.045 | -0.07    | 0.11     | 0.41     | 0.682    |       |
| Travemünde (16 PSU)           | 20 | 0.06     | 0.037 | -0.01    | 0.13     | 1.60     | 0.113    |       |
| Mariehamn (5 PSU)             | 10 | 0.24     | 0.044 | 0.16     | 0.33     | 5.57     | <0.001   | ***   |
| Turku (5 PSU)                 | 5  | 0.28     | 0.054 | 0.17     | 0.38     | 5.13     | <0.001   | ***   |
| Raahe (5 PSU)                 | 7  | 0.01     | 0.048 | -0.08    | 0.11     | 0.28     | 0.782    |       |
| Elbe (0 PSU)                  | 4  | -0.10    | 0.059 | -0.21    | 0.02     | -1.63    | 0.106    |       |
| Rhine (0 PSU)                 | 5  | -0.04    | 0.054 | -0.15    | 0.07     | -0.78    | 0.435    |       |
| Danube* (0 PSU)               | 14 | -0.03    | 0.040 | -0.11    | 0.05     | -0.76    | 0.449    |       |

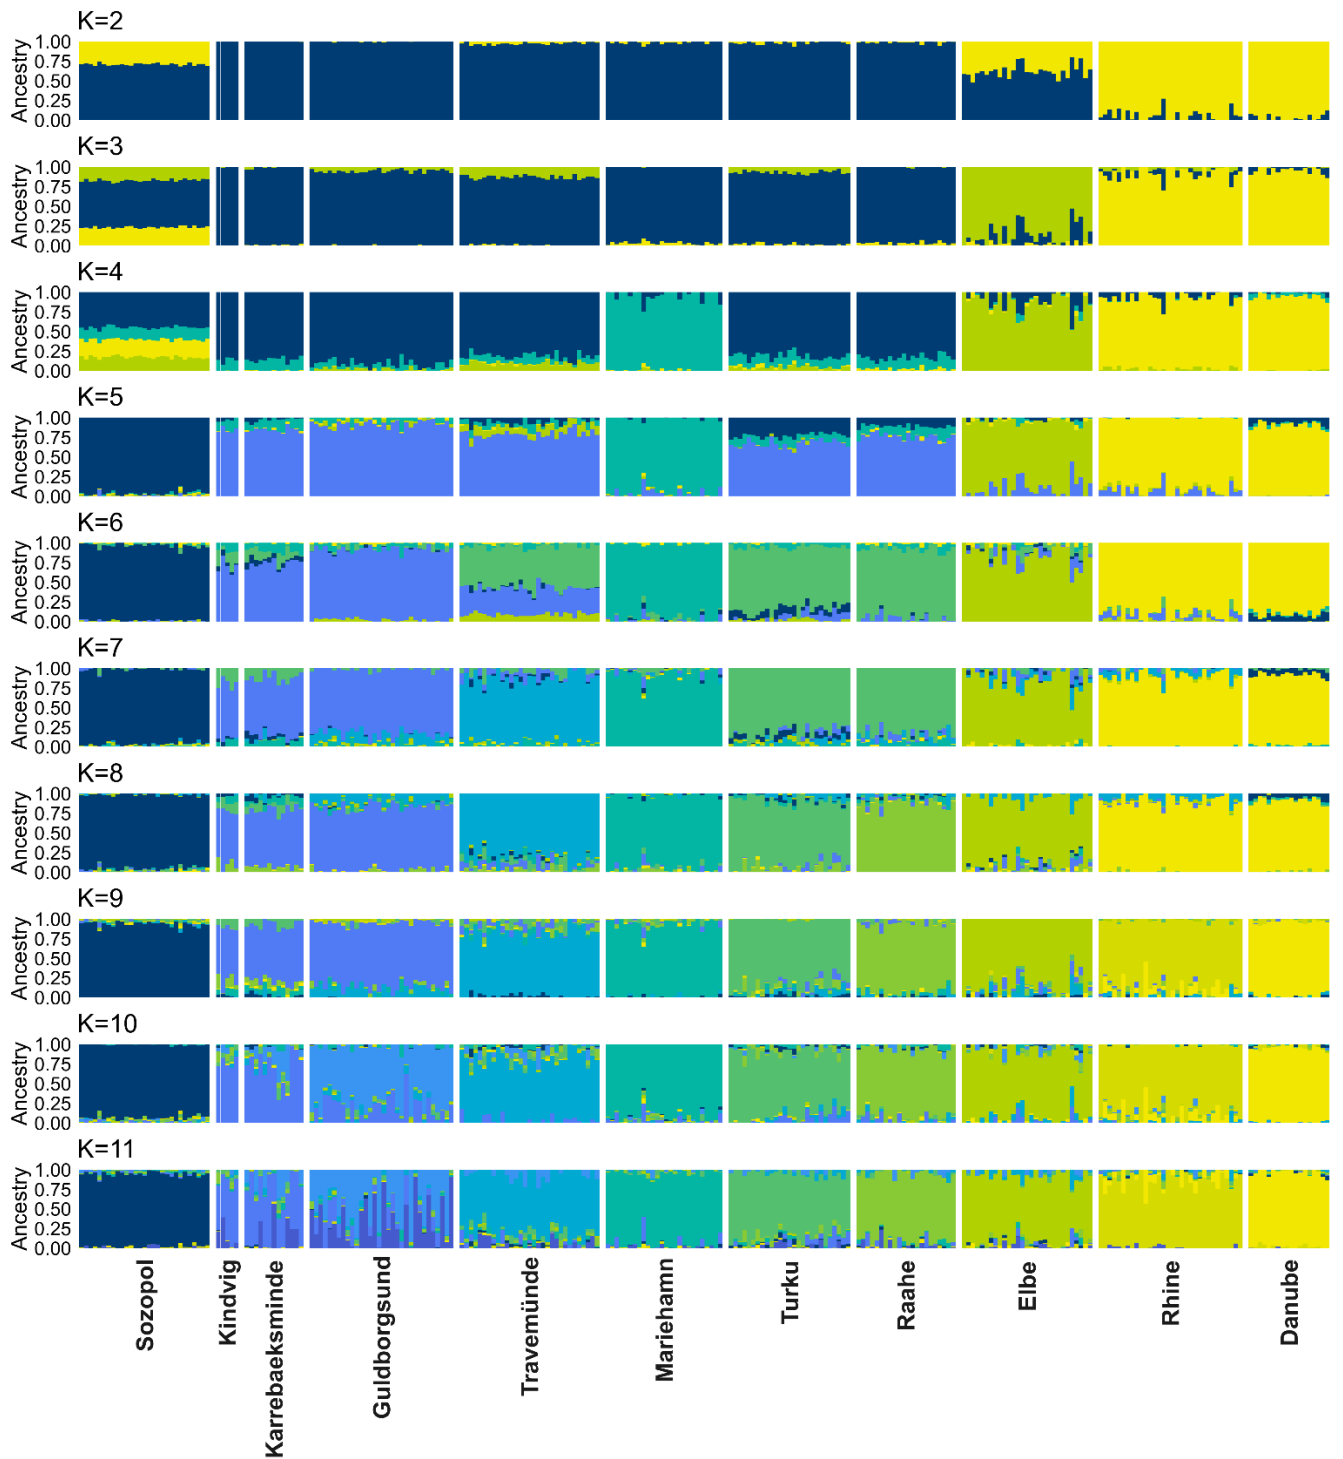

**Supplementary Figure S1.** Individual ancestry estimates using sNMF of 264 round gobies (*Neogobius melanostomus*) based on 13847 SNPs, for K = 2 - 11. Each vertical bar represents one individual and the colour the proportion of that individual assigned to the different K clusters.

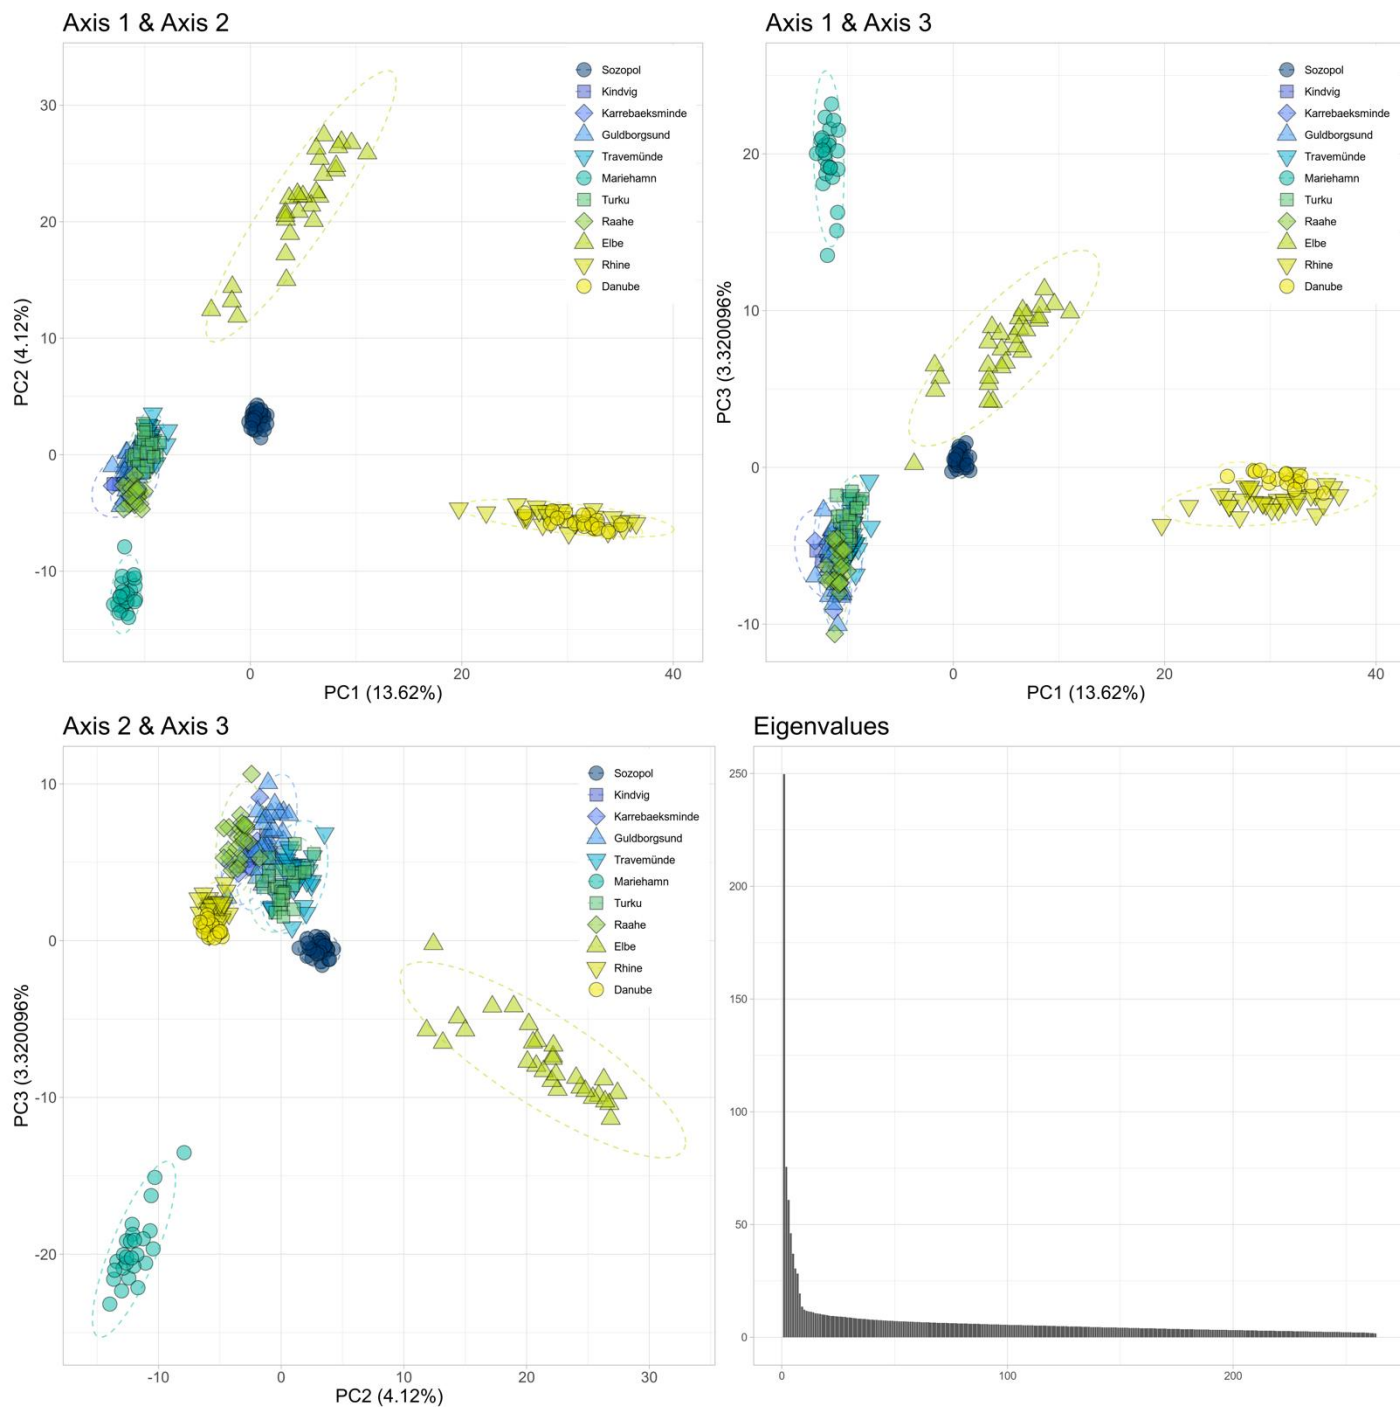

**Supplementary Figure S2.** Complete visualisation of axes 1-3 First components of a principal component analysis (PCA) on 264 round gobies (*Neogobius melanostomus*) calculated from 13847 SNPs. Name of the PCA panels shows the order components as x-axis and y-axis. Percentage of variation per axis is noted at each axis. Each point represents one individual, colours represent sampling origin and shape is used for better distinction between sites. Eigenvalues show the relative explanatory power of each component (axis).
